# Supplementary material for: Aerobic and oxygen-limited naphthalene-amended enrichments induced the dominance of Pseudomonas spp. from a groundwater bacterial biofilm
Source: PubMed Central journal article supplement (PMC7306034; doi:10.1007/s00253-020-10668-y), 2020-05-16
Supplement: 253_2020_10668_MOESM1_ESM.pdf [file 253_2020_10668_MOESM1_ESM.pdf]

**Journal Name: Applied Microbiology and Biotechnology**

**Manuscript Title: Aerobic and oxygen-limited naphthalene amended enrichments induced the dominance of *Pseudomonas* spp. from a groundwater bacterial biofilm**

Tibor BENEDEK<sup>a\*</sup>, Flóra SZENTGYÖRGYI<sup>b</sup>, István SZABÓ<sup>b</sup>, Milán FARKAS<sup>b</sup>, Robert DURAN<sup>c</sup>, Balázs KRISZT<sup>b</sup>, András TÁNCICS<sup>a</sup>

*<sup>a</sup>Szent István University, Regional University Centre of Excellence in Environmental Industry, Gödöllő, H-2100, Páter K. u. 1, Hungary;*

*<sup>b</sup>Szent István University, Department of Environmental Protection and Safety, Gödöllő, H-2100, Páter K. u. 1, Hungary;*

*<sup>c</sup>IPREM UMR CNRS 5254, Equipe Environnement et Microbiologie, MELODY Group, Université de Pau et des Pays de l'Adour, Pau, France.*

\*Corresponding author: Tel.: +36-(28)-522-000 ext. 1611

Fax: -

E-mail: benedek.tibor@fh.szie.hu

Number of figures: 2

Number of tables: 2

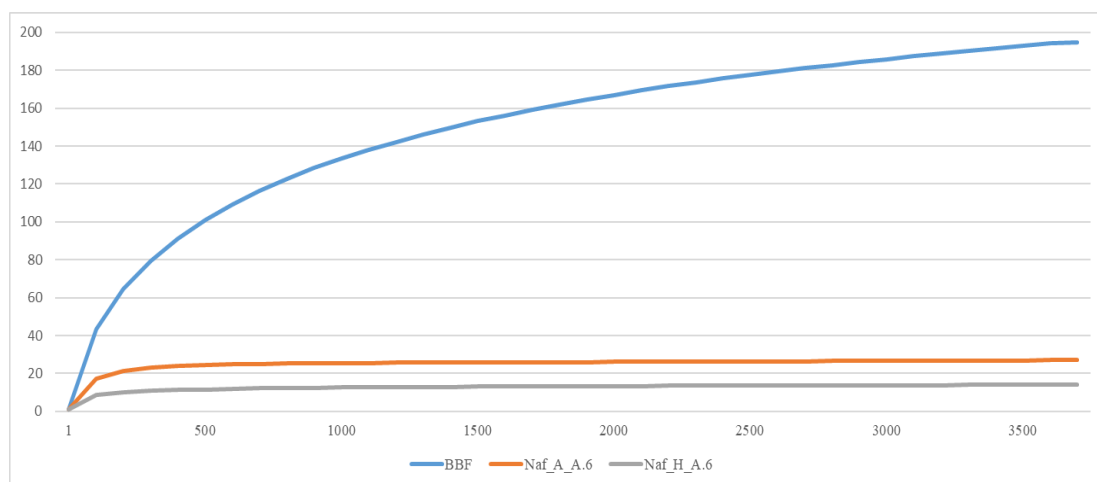

**Fig. S1** Rarefaction curves of samples selected for Illumina *16S rRNA* gene based amplicon sequencing

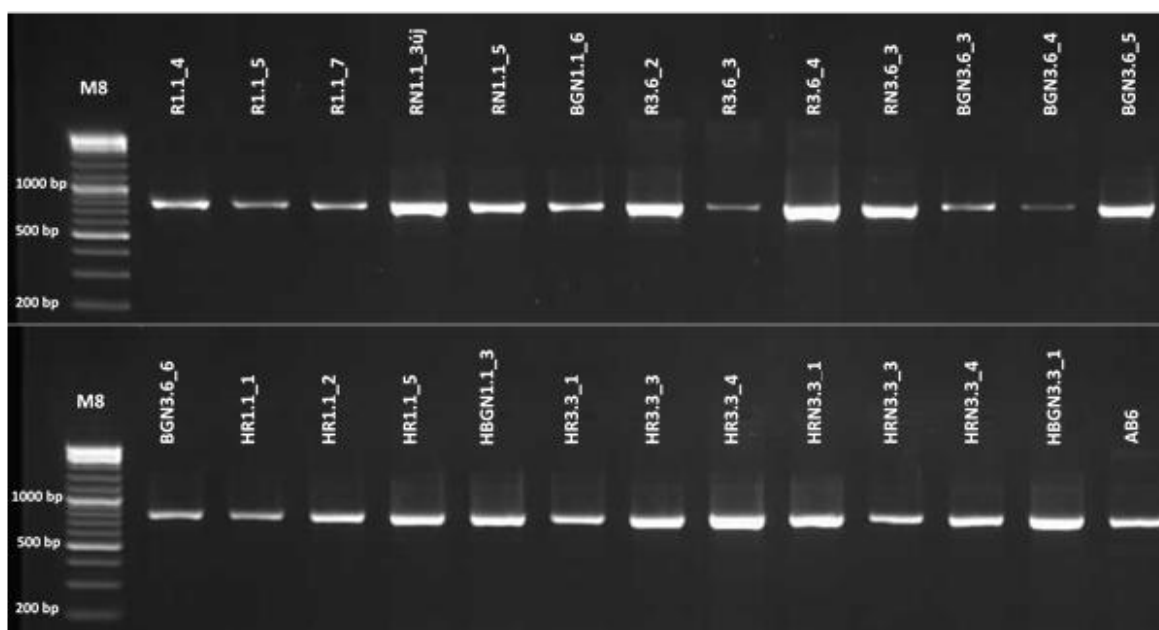

**Fig. S2** Detection of NDO related 2Fe-2S reductase component genes of isolates by using the newly designed CODEHOP primer set. 1% agarose gel image. The expected amplicon size is 750 bps.

**Table S1** Community composition and bacterial diversity of the investigated samples based on the Illumina *16S rRNA* gene amplicon sequencing dataset

|                                                                                     | <b>Initial Biofilm</b> | <b>Aerobic Enrichment (NAF_A_A.6)</b> | <b>Oxygen-Limited Enrichment (NAF_H_A.6)</b> |
|-------------------------------------------------------------------------------------|------------------------|---------------------------------------|----------------------------------------------|
| <b>Illumina <i>16S rRNA</i> amplicon sequencing data</b>                            |                        |                                       |                                              |
| Initial sequence read numbers                                                       | 63828                  | 16683                                 | 40765                                        |
| Sequence read numbers after streaming                                               | 44618                  | 3660                                  | 40765                                        |
| Coverage                                                                            | 0.988                  | 0.999                                 | 0.999                                        |
| Shannon diversity <sub>H</sub>                                                      | 3.8                    | 1.9                                   | 1.3                                          |
| <b><sup>a</sup>Taxonomic composition at the CLASS level (relative abundance, %)</b> |                        |                                       |                                              |
| <i>Deltaproteobacteria</i>                                                          | 2.5                    | 6.5                                   | ND                                           |
| <i>Actinobacteria</i>                                                               | 0.1                    | 2.8                                   | ND                                           |
| <i>Holophagae</i>                                                                   | 4.0                    | ND                                    | ND                                           |
| <i>Campylobacteria</i>                                                              | 5.0                    | ND                                    | ND                                           |
| <i>Alphaproteobacteria</i>                                                          | 5.5                    | 4.0                                   | 0.1                                          |
| <i>Bacteroidia</i>                                                                  | 8.0                    | 12.0                                  | ND                                           |
| <i>Gammaproteobacteria</i>                                                          | 73.6                   | 73.5                                  | 99.9                                         |
| <b><sup>a</sup>Taxonomic composition at the ORDER level (relative abundance, %)</b> |                        |                                       |                                              |
| <i>Caulobacterales</i>                                                              | 1.9                    | 0.3                                   | ND                                           |
| <i>Cytophagales</i>                                                                 | ND <sup>b</sup>        | 2.2                                   | ND                                           |
| <i>Micrococcales</i>                                                                | ND                     | 2.8                                   | ND                                           |
| <i>Sphingobacteriales</i>                                                           | ND                     | 3.1                                   | ND                                           |
| <i>Holophagales</i>                                                                 | 4.0                    | ND                                    | ND                                           |
| <i>Xanthomonadales</i>                                                              | 5.0                    | 7.0                                   | 3.1                                          |
| <i>Enterobacteriales</i>                                                            | ND                     | ND                                    | 3.8                                          |
| <i>Chitinophagales</i>                                                              | ND                     | 4.4                                   | ND                                           |
| <i>Campylobacteriales</i>                                                           | 6.0                    | ND                                    | ND                                           |
| <i>Flavobacteriales</i>                                                             | 6.0                    | 2.6                                   | ND                                           |
| <i>Myxococcales</i>                                                                 | ND                     | 6.1                                   | ND                                           |
| <i>Betaproteobacteriales</i>                                                        | 76.8                   | 8.9                                   | 24.9                                         |
| <i>Pseudomonadales</i>                                                              | 0.3                    | 61.4                                  | 68.1                                         |
| <b><sup>a</sup>Taxonomic composition at the GENUS level (relative abundance, %)</b> |                        |                                       |                                              |
| <i>Xanthomonadaceae_unclassified</i>                                                | 3.0                    | 7.0                                   | 0.4                                          |
| <i>Arcobacter</i>                                                                   | 3.0                    | ND                                    | ND                                           |
| <i>Hydrogenophaga</i>                                                               | 3.2                    | 3.6                                   | ND                                           |
| <i>Candidimonas</i>                                                                 | ND                     | ND                                    | 2.0                                          |
| <i>Achromobacter</i>                                                                | ND                     | ND                                    | 2.4                                          |
| <i>Flavobacterium</i>                                                               | 2.5                    | 2.6                                   | ND                                           |
| <i>Simplicispira</i>                                                                | 3.6                    | ND                                    | 0.4                                          |
| <i>Burkholderiaceae_unclassified</i>                                                | 3.6                    | ND                                    | ND                                           |
| <i>Sulfurinomas</i>                                                                 | 3.7                    | ND                                    | ND                                           |
| <i>Rhodanobacter</i>                                                                | ND                     | ND                                    | 2.7                                          |
| <i>Geothrix</i>                                                                     | 3.8                    | ND                                    | ND                                           |
| <i>Rhodocyclaceae_unclassified</i>                                                  | 3.0                    | ND                                    | ND                                           |
| <i>Lysobacter</i>                                                                   | 3.0                    | ND                                    | ND                                           |
| <i>Brevundimonas</i>                                                                | 3.0                    | ND                                    | ND                                           |
| <i>Paenarthrobacter</i>                                                             | ND                     | 2.8                                   | ND                                           |
| <i>Sediminibacterium</i>                                                            | 0.2                    | 3.4                                   | ND                                           |
| <i>Aquabacterium</i>                                                                | ND                     | 3.6                                   | ND                                           |

|                                        |      |      |      |
|----------------------------------------|------|------|------|
| <i>Enterobacteriaceae_unclassified</i> | ND   | ND   | 3.8  |
| <i>Zoogloea</i>                        | 4.9  | ND   | ND   |
| <i>Rhodoferrax</i>                     | 5.1  | ND   | ND   |
| <i>Thauera</i>                         | 4.7  | ND   | ND   |
| <i>Acidovorax</i>                      | 6.7  | ND   | 10.7 |
| <i>Thermomonas</i>                     | 0.2  | 6.6  | 0.4  |
| <i>Unknown Labilithrix</i>             | ND   | 7.1  | ND   |
| <i>Castellaniella</i>                  | ND   | ND   | 9.8  |
| <i>Azoarcus</i>                        | 12.5 | ND   | ND   |
| <i>Sulfuritalea</i>                    | 29.4 | ND   | ND   |
| <i>Pseudomonas</i>                     | 0.3  | 61.6 | 68.1 |

<sup>a</sup>**Taxonomic composition at the SPECIES level** (relative abundance, %)

|                                                                    |      |      |      |
|--------------------------------------------------------------------|------|------|------|
| <i>Pseudomonas veronii/P. extremaustralis</i> (98.9%) <sup>c</sup> | ND   | 0.7  | 63.8 |
| <i>Pseudomonas laurentiana</i> (99.8%)                             | ND   | 56.6 | ND   |
| <i>Rugosibacter aromaticivorans</i> (96.6%)                        | 17.0 | ND   | ND   |
| <i>Acidovorax defluvii</i> (99.6%)                                 | 4.6  | 0.4  | 11.2 |
| <i>Aromatoleum bremense</i> (99.6%)                                | 11.2 | ND   | ND   |
| <i>Castellaniella caeni</i> (98.7%)                                | ND   | ND   | 10.4 |
| <i>Thauera humireducens</i> (99.35%)                               | 3.9  | ND   | ND   |
| <i>Citrobacter portucalensis</i> (99.6%)                           | ND   | ND   | 3.7  |
| <i>Albidiferax ferrireducens</i> (97.9%)                           | 4.1  | ND   | ND   |
| <i>Malikia spinosa</i> (99.4%)                                     | 2.1  | 2.9  | ND   |
| <i>Unknown Labilithrix</i> (92%)                                   | ND   | 7.1  | ND   |
| <i>Luteimonas abyssi v terrae.</i> (95.7%)                         | ND   | 5.3  | ND   |
| <i>Sulfuritalea hydrogenivorans</i> (98.3%)                        | 3.6  | ND   | ND   |
| <i>Pseudomonas songnenensis</i> (99.4%)                            | ND   | ND   | 3.2  |
| <i>Simplicispira psychrophila</i> (98.9%)                          | 2.4  | ND   | 0.6  |
| <i>Geothrix fermentas</i> (96.1%)                                  | 2.9  | ND   | ND   |
| <i>Achromobacter pulmonis v agilis v anxifer</i> (99.6%)           | ND   | 0.7  | 2.4  |
| <i>Zoogloea ramigera</i> (97.0%)                                   | 2.6  | ND   | ND   |
| <i>Sulfurimonas gotlandica</i> (95.9%)                             | 2.4  | ND   | ND   |
| <i>Rhodanobacter thiooxydans</i> (99.4%)                           | ND   | ND   | 2.3  |
| <i>Aquabacterium parvum</i> (98.2%)                                | ND   | 3.3  | ND   |
| <i>Sediminibacterium goheungense</i> (97.6%)                       | 0.1  | 3.0  | ND   |
| <i>Paenarthrobacter nitroguajacolicus</i> (99.8%)                  | ND   | 2.5  | ND   |
| <i>Flavobacterium buctense</i> (97.4%)                             | ND   | 2.0  | ND   |

<sup>a</sup> – bacteria with relative abundance equal or higher than 2% at least in one of the samples are shown

<sup>b</sup> – Non-detectable

<sup>c</sup> – 16S rRNA gene sequence similarities according to the EzTaxon-e database are shown in parentheses (<http://eztaxon-e.ezbiocloud.net/>)

**Table S2** Absorbance values measured at 550 nm for each isolate, obtained during the microplate assay

| Samples            | Incubation time (hours)            |      |                                    |      |                                    |      |
|--------------------|------------------------------------|------|------------------------------------|------|------------------------------------|------|
|                    | 24                                 |      | 48                                 |      | 72                                 |      |
|                    | Mean absorbance measured at 550 nm | STD  | Mean absorbance measured at 550 nm | STD  | Mean absorbance measured at 550 nm | STD  |
| <b>Negative c.</b> | 0.13                               | 0.04 | 0.13                               | 0.04 | 0.13                               | 0.04 |
| <b>R1.1_4</b>      | 0.14                               | 0.01 | 0.15                               | 0.01 | 0.17                               | 0.05 |
| <b>R1.1_5</b>      | 0.16                               | 0.01 | 0.14                               | 0.00 | 0.19                               | 0.02 |
| <b>R1.1_7</b>      | 0.62                               | 0.02 | 0.29                               | 0.01 | 0.66                               | 0.23 |
| <b>RN1.1_1</b>     | 0.65                               | 0.02 | 0.36                               | 0.02 | 0.46                               | 0.01 |
| <b>RN1.1_3 uj</b>  | 0.30                               | 0.01 | 0.64                               | 0.04 | 0.56                               | 0.02 |
| <b>RN1.1_4F</b>    | 0.22                               | 0.09 | 0.16                               | 0.00 | 0.13                               | 0.00 |
| <b>RN1.1_5</b>     | 0.14                               | 0.00 | 0.13                               | 0.01 | 0.15                               | 0.02 |
| <b>RN1.1_7</b>     | 0.75                               | 0.06 | 0.31                               | 0.03 | 0.19                               | 0.01 |
| <b>BGN1.1_2</b>    | 0.25                               | 0.00 | 0.34                               | 0.01 | 1.43                               | 0.13 |
| <b>BGN1.1_3</b>    | 0.32                               | 0.14 | 0.17                               | 0.01 | 0.15                               | 0.02 |
| <b>BGN1.1_4</b>    | 0.15                               | 0.02 | 0.15                               | 0.01 | 0.19                               | 0.05 |
| <b>BGN1.1_5</b>    | 0.15                               | 0.01 | 0.22                               | 0.02 | 0.23                               | 0.07 |
| <b>BGN1.1_6</b>    | 0.19                               | 0.08 | 0.15                               | 0.00 | 0.17                               | 0.01 |
| <b>BGN1.1_8</b>    | 0.15                               | 0.02 | 0.16                               | 0.02 | 0.24                               | 0.07 |
| <b>R3.6_1</b>      | 0.22                               | 0.01 | 0.28                               | 0.16 | 0.35                               | 0.12 |
| <b>R3.6_2</b>      | 0.31                               | 0.02 | 0.25                               | 0.02 | 0.42                               | 0.07 |
| <b>R3.6_3</b>      | 0.26                               | 0.02 | 0.21                               | 0.02 | 0.44                               | 0.14 |
| <b>R3.6_4</b>      | 0.43                               | 0.05 | 0.31                               | 0.13 | 0.26                               | 0.02 |
| <b>RN3.6_1</b>     | 0.16                               | 0.01 | 0.18                               | 0.02 | 0.21                               | 0.01 |
| <b>RN3.6_3</b>     | 0.51                               | 0.03 | 0.25                               | 0.01 | 0.23                               | 0.02 |
| <b>RN3.6_4</b>     | 0.32                               | 0.04 | 0.24                               | 0.01 | 0.30                               | 0.05 |
| <b>BGN3.6_1</b>    | 0.18                               | 0.01 | 0.19                               | 0.02 | 0.22                               | 0.03 |
| <b>BGN3.6_2</b>    | 0.29                               | 0.01 | 0.38                               | 0.10 | 1.01                               | 0.03 |
| <b>BGN3.6_3</b>    | 0.19                               | 0.01 | 0.80                               | 0.03 | 1.67                               | 0.05 |
| <b>BGN3.6_4</b>    | 0.26                               | 0.02 | 0.19                               | 0.01 | 0.17                               | 0.01 |
| <b>BGN3.6_5</b>    | 0.44                               | 0.02 | 0.25                               | 0.02 | 0.28                               | 0.00 |
| <b>BGN3.6_6</b>    | 0.22                               | 0.02 | 0.71                               | 0.04 | 0.99                               | 0.13 |
| <b>HR1.1_1</b>     | 2.86                               | 0.18 | 2.68                               | 0.12 | 2.94                               | 0.24 |
| <b>HR1.1_2</b>     | 0.87                               | 0.06 | 0.37                               | 0.02 | 0.50                               | 0.14 |
| <b>HR1.1_5</b>     | 0.73                               | 0.03 | 0.76                               | 0.09 | 0.99                               | 0.37 |
| <b>HBGN1.1_3</b>   | 0.26                               | 0.04 | 0.17                               | 0.01 | 0.23                               | 0.02 |
| <b>HBGN1.1_4</b>   | 0.59                               | 0.04 | 0.96                               | 0.09 | 1.45                               | 0.20 |
| <b>HR3.3_1</b>     | 0.45                               | 0.06 | 0.91                               | 0.09 | 1.35                               | 0.09 |
| <b>HR3.3_3</b>     | 2.68                               | 0.23 | 3.22                               | 0.13 | 3.57                               | 0.06 |
| <b>HR3.3_4</b>     | 2.64                               | 0.25 | 3.39                               | 0.42 | 3.88                               | 0.01 |
| <b>HR3.3_5</b>     | 0.38                               | 0.02 | 0.21                               | 0.03 | 0.38                               | 0.06 |
| <b>HRN3.3_1</b>    | 0.94                               | 0.08 | 0.98                               | 0.11 | 1.26                               | 0.06 |

|                          |      |      |      |      |      |      |
|--------------------------|------|------|------|------|------|------|
| <b>HRN3.3_3</b>          | 1.25 | 0.17 | 0.94 | 0.16 | 1.28 | 0.11 |
| <b>HRN3.3_4</b>          | 0.58 | 0.02 | 1.46 | 0.07 | 2.22 | 0.07 |
| <b>HBG3.3_1</b>          | 1.19 | 0.03 | 3.39 | 0.22 | 3.96 | 0.01 |
| <b>A<sub>C</sub></b>     | 0.14 |      |      |      |      |      |
| <b>2 x A<sub>C</sub></b> | 0.28 |      |      |      |      |      |
| <b>4 x A<sub>C</sub></b> | 0.56 |      |      |      |      |      |

A<sub>C</sub> – cut-off absorbance value for the microplate assay, three standard deviations above the mean absorbance of the negative control.

2 x A<sub>C</sub> – level of *weakly adherent*

4 x A<sub>C</sub> – level of *strongly adherent*

STD – standard deviation
